# Supplementary material
Source: PubMed Central journal article supplement (PMC6743055)
Supplement: jamaotolaryngolheadnecksurg-145-1001-s001.pdf [file jamaotolaryngolheadnecksurg-145-1001-s001.pdf]

## Supplementary Online Content

Liao DZ, Schlecht NF, Rosenblatt G, et al. Association of delayed time to treatment initiation with overall survival and recurrence among patients with head and neck squamous cell carcinoma in an underserved urban population. *JAMA Otolaryngol Head Neck Surg*. Published online September 12, 2019. doi:10.1001/jamaoto.2019.2414

**eFigure 1.** Diagram of Cohort Creation With Exclusion Criteria

**eFigure 2.** Box and Whisker Plots of TTI for Different Treatment Modalities

**eTable 1.** Hazard Ratios for TTI>60 (vs TTI≤60) in Subgroup Analysis of Primary Site, Treatment Modality, and Final Stage

**eTable 2.** Full Multivariate Logistic Regression to Examine Significant Factors That Could Potentially Predict Delayed TTI Based on the Optimal Threshold of 60 Days

**eTable 3.** Patient Characteristics of Patients With TTI=0 That Were Excluded Due to Miscoding Compared to Remaining Cohort

**eTable 4.** Sensitivity Analysis for Exclusion of TTI=0

**eTable 5.** Sensitivity Analysis for Exclusion of Patients With Follow-up ≤2 Months

**eTable 6.** Full Multivariate Logistic Regression to Examine Significant Factors That Could Potentially Predict Delayed TTI Based on the Optimal Threshold of 60 Days

This supplementary material has been provided by the authors to give readers additional information about their work.

**eFigure 1.** Diagram of cohort creation with exclusion criteria

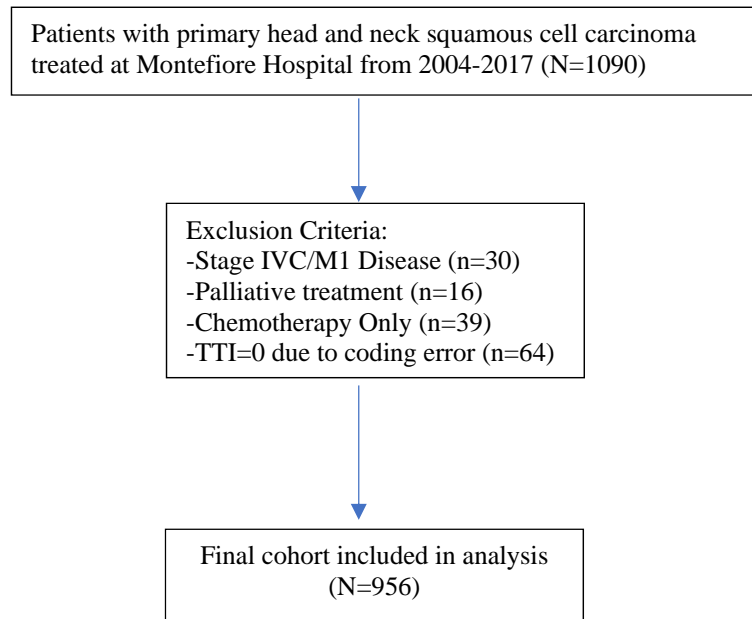

**eFigure 2.** Box and whisker plots of TTI for different treatment modalities. RT/CRT=radiotherapy/chemoradiotherapy, S=Surgery Only, S+ = Surgery with Adjuvant Therapy. Box and whisker plots show Q1-1.5 \* IQR, Q1, Median, Q3, Q3+1.5\*IQR, and outliers are not included. Green dashed line are references lines for the specific TTI thresholds for specific groups (RT/CRT Threshold=56 days, S Threshold =62 days, S+ Threshold =71 days) calculated by RPA. Red line is a reference line for the overall threshold of 60 as calculated by recursive partitioning.

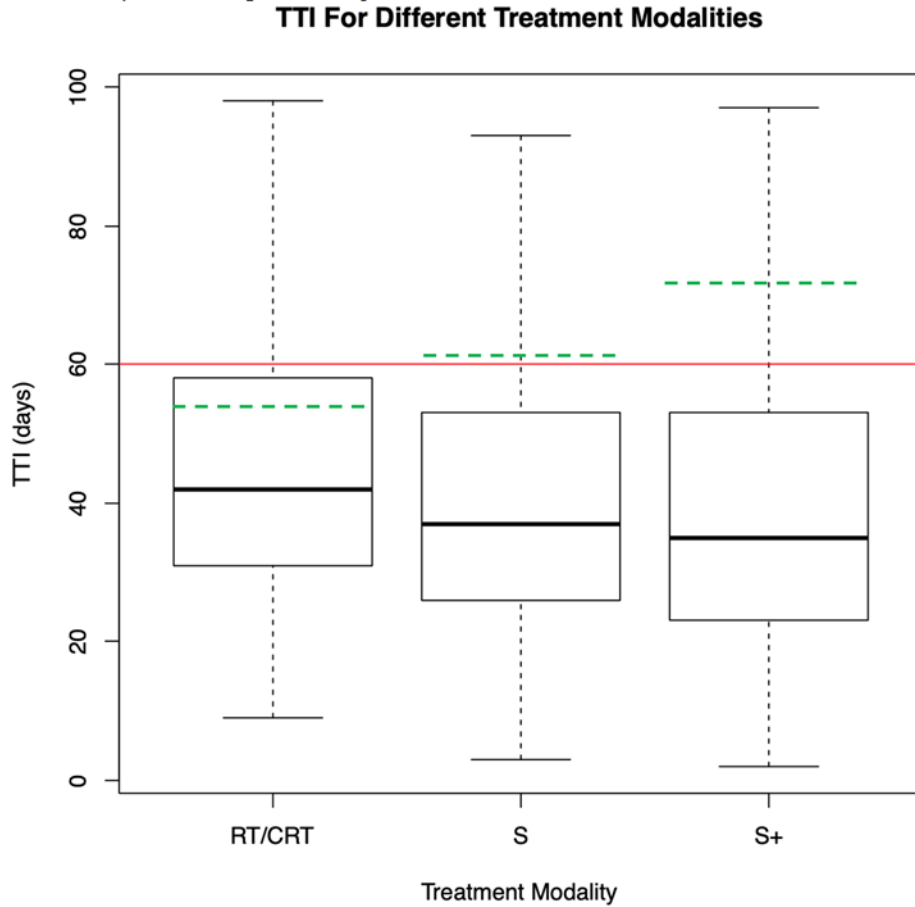

**eTable 1.** Patient characteristics of patients with TTI=0 that were excluded due to miscoding compared to remaining cohort.

|                             | No. (%) with TTI=0 (n=60) |         | No. (%) with TTI>0 (n=956) |         | Total (n=1016) |
|-----------------------------|---------------------------|---------|----------------------------|---------|----------------|
| <b>Treatment Category</b>   |                           |         |                            |         |                |
| CRT                         | 1                         | (1.7%)  | 525                        | (54.9%) | 526            |
| S                           | 31                        | (51.7%) | 218                        | (22.8%) | 249            |
| S+                          | 28                        | (46.7%) | 213                        | (22.3%) | 241            |
| <b>Treatment Completion</b> |                           |         |                            |         |                |
| No                          | 1                         | (1.7%)  | 44                         | (4.6%)  | 45             |
| Yes                         | 44                        | (73.3%) | 691                        | (72.3%) | 735            |
| N/A                         | 15                        | (25.0%) | 221                        | (23.1%) | 236            |
| <b>Age</b>                  |                           |         |                            |         |                |
| <50                         | 8                         | (13.3%) | 101                        | (10.6%) | 109            |
| 50-59                       | 21                        | (35.0%) | 279                        | (29.2%) | 300            |
| 60-69                       | 10                        | (16.7%) | 294                        | (30.8%) | 304            |
| 70+                         | 21                        | (35.0%) | 282                        | (29.5%) | 303            |
| <b>Smoking Status</b>       |                           |         |                            |         |                |
| Current                     | 16                        | (26.7%) | 373                        | (39.0%) | 389            |
| Never                       | 14                        | (23.3%) | 193                        | (20.2%) | 207            |
| Previous                    | 28                        | (46.7%) | 368                        | (38.5%) | 396            |
| Unknown                     | 2                         | (3.3%)  | 22                         | (2.3%)  | 24             |
| <b>Charlson/Deyo</b>        |                           |         |                            |         |                |
| 0                           | 53                        | (88.3%) | 829                        | (86.7%) | 882            |
| 1                           | 2                         | (3.3%)  | 16                         | (1.7%)  | 18             |
| 2+                          | 5                         | (8.3%)  | 111                        | (11.6%) | 116            |
| <b>Final Stage</b>          |                           |         |                            |         |                |
| N/A                         | 5                         | (8.3%)  | 21                         | (2.2%)  | 26             |
| 1                           | 22                        | (36.7%) | 139                        | (14.5%) | 161            |
| 2                           | 6                         | (10.0%) | 127                        | (13.3%) | 133            |
| 3                           | 11                        | (18.3%) | 186                        | (19.5%) | 197            |
| 4                           | 16                        | (26.7%) | 483                        | (50.5%) | 499            |
| <b>Tumor Site</b>           |                           |         |                            |         |                |
| Larynx                      | 21                        | (35.0%) | 332                        | (34.7%) | 353            |
| Hypopharynx                 | 3                         | (5.0%)  | 63                         | (6.6%)  | 66             |
| Lip/Oral                    | 14                        | (23.3%) | 202                        | (21.1%) | 216            |
| Nasopharynx                 | 0                         | (0.0%)  | 40                         | (4.2%)  | 40             |
| Nose/Sinus                  | 5                         | (8.3%)  | 30                         | (3.1%)  | 35             |
| Oropharynx                  | 17                        | (28.3%) | 289                        | (30.2%) | 306            |

**eTable 2.** Sensitivity analysis for exclusion of TTI=0. Multivariate logistic regression models run with TTI=0 treated as TTI>60 and TTI≤60.

|                             | All TTI=0 treated as TTI>60 |                         |       |  | All TTI=0 treated as TTI≤60 |                         |       |
|-----------------------------|-----------------------------|-------------------------|-------|--|-----------------------------|-------------------------|-------|
|                             | Hazard Ratio                | 95% CI for Hazard Ratio |       |  | Hazard Ratio                | 95% CI for Hazard Ratio |       |
|                             |                             | Lower                   | Upper |  |                             | Lower                   | Upper |
| <b>TTI&gt;60 days</b>       | 1.47                        | 1.163                   | 1.859 |  | 1.585                       | 1.239                   | 2.028 |
| <b>Tumor Site</b>           |                             |                         |       |  |                             |                         |       |
| Larynx (Reference)          |                             |                         |       |  |                             |                         |       |
| Hypopharynx                 | 1.375                       | 0.932                   | 2.026 |  | 1.375                       | 0.932                   | 2.026 |
| Lip/Oral                    | 0.913                       | 0.665                   | 1.255 |  | 0.913                       | 0.665                   | 1.255 |
| Nasopharynx                 | 1.076                       | 0.598                   | 1.937 |  | 1.076                       | 0.598                   | 1.937 |
| Nose/Sinus                  | 1.294                       | 0.724                   | 2.313 |  | 1.294                       | 0.724                   | 2.313 |
| Oropharynx                  | 0.639                       | 0.474                   | 0.861 |  | 0.639                       | 0.474                   | 0.861 |
| <b>Age</b>                  |                             |                         |       |  |                             |                         |       |
| <50 years (Reference)       |                             |                         |       |  |                             |                         |       |
| 50-60                       | 1.135                       | 0.717                   | 1.799 |  | 1.112                       | 0.702                   | 1.76  |
| 60-70                       | 1.64                        | 1.041                   | 2.585 |  | 1.594                       | 1.012                   | 2.511 |
| 70+                         | 2.237                       | 1.426                   | 3.509 |  | 2.215                       | 1.412                   | 3.473 |
| <b>Tobacco Use</b>          |                             |                         |       |  |                             |                         |       |
| Current (Reference)         |                             |                         |       |  |                             |                         |       |
| Never                       | 0.579                       | 0.405                   | 0.829 |  | 0.579                       | 0.405                   | 0.828 |
| Previous                    | 0.887                       | 0.702                   | 1.121 |  | 0.888                       | 0.702                   | 1.122 |
| Unknown                     | 1.464                       | 0.832                   | 2.575 |  | 1.449                       | 0.823                   | 2.55  |
| <b>Charlson/Deyo</b>        |                             |                         |       |  |                             |                         |       |
| 0 (Reference)               |                             |                         |       |  |                             |                         |       |
| 1                           | 1.631                       | 0.829                   | 3.21  |  | 1.64                        | 0.833                   | 3.23  |
| 2+                          | 1.756                       | 1.294                   | 2.384 |  | 1.727                       | 1.272                   | 2.344 |
| <b>Treatment Modality</b>   |                             |                         |       |  |                             |                         |       |
| RT/CRT (Reference)          |                             |                         |       |  |                             |                         |       |
| S                           | 0.759                       | 0.549                   | 1.05  |  | 0.728                       | 0.527                   | 1.006 |
| S+                          | 0.704                       | 0.531                   | 0.934 |  | 0.664                       | 0.502                   | 0.879 |
| <b>Treatment Completion</b> |                             |                         |       |  |                             |                         |       |
| No (Reference)              |                             |                         |       |  |                             |                         |       |
| Yes                         | 0.333                       | 0.217                   | 0.509 |  | 0.339                       | 0.221                   | 0.519 |
| N/A                         | 0.721                       | 0.462                   | 1.125 |  | 0.736                       | 0.472                   | 1.148 |
| <b>Final Stage</b>          |                             |                         |       |  |                             |                         |       |
| 4 (Reference)               |                             |                         |       |  |                             |                         |       |

|                                    |       |       |       |  |       |       |       |
|------------------------------------|-------|-------|-------|--|-------|-------|-------|
| N/A                                | 1.593 | 0.8   | 3.171 |  | 1.688 | 0.849 | 3.359 |
| 1                                  | 0.353 | 0.236 | 0.528 |  | 0.361 | 0.242 | 0.54  |
| 2                                  | 0.545 | 0.369 | 0.806 |  | 0.539 | 0.364 | 0.796 |
| 3                                  | 0.581 | 0.43  | 0.786 |  | 0.581 | 0.43  | 0.786 |
| <b>Race/Ethnicity</b>              |       |       |       |  |       |       |       |
| Black/African-American (Reference) |       |       |       |  |       |       |       |
| Asian                              | 2.198 | 0.913 | 5.295 |  | 2.155 | 0.893 | 5.205 |
| Declined                           | 0.836 | 0.569 | 1.226 |  | 0.834 | 0.568 | 1.225 |
| Hispanic                           | 1.329 | 0.971 | 1.82  |  | 1.337 | 0.977 | 1.83  |
| White                              | 1.437 | 1.064 | 1.939 |  | 1.438 | 1.066 | 1.941 |
| <b>Language</b>                    |       |       |       |  |       |       |       |
| Not English (Reference)            |       |       |       |  |       |       |       |
| English                            | 0.747 | 0.555 | 1.005 |  | 0.739 | 0.549 | 0.995 |
| N/A                                | 1.177 | 0.714 | 1.94  |  | 1.135 | 0.687 | 1.876 |

**eTable 3.** Patient characteristics of patients with follow-up time ≤ 2 months that were excluded to achieve proportional hazards compared to remaining cohort.

|                             | No. (%) with follow-up ≤ 2 months (n=19) |         | No. (%) with follow-up > 2 months (n=937) |         | Total (n=956) |
|-----------------------------|------------------------------------------|---------|-------------------------------------------|---------|---------------|
| <b>Treatment Category</b>   |                                          |         |                                           |         |               |
| CRT                         | 8                                        | (42.1%) | 517                                       | (55.2%) | 525           |
| S                           | 11                                       | (57.9%) | 207                                       | (22.1%) | 218           |
| S+                          | 0                                        | (0.0%)  | 213                                       | (22.7%) | 213           |
| <b>Treatment Completion</b> |                                          |         |                                           |         |               |
| No                          | 3                                        | (15.8%) | 41                                        | (4.4%)  | 44            |
| Yes                         | 5                                        | (26.3%) | 686                                       | (73.2%) | 691           |
| N/A                         | 11                                       | (57.9%) | 210                                       | (22.4%) | 221           |
| <b>Age</b>                  |                                          |         |                                           |         |               |
| <50                         | 0                                        | (0.0%)  | 101                                       | (10.8%) | 101           |
| 50-59                       | 3                                        | (15.8%) | 276                                       | (29.5%) | 279           |
| 60-69                       | 5                                        | (26.3%) | 289                                       | (30.8%) | 294           |
| 70+                         | 11                                       | (57.9%) | 271                                       | (28.9%) | 282           |
| <b>Smoking Status</b>       |                                          |         |                                           |         |               |
| Current                     | 7                                        | (36.8%) | 366                                       | (39.1%) | 373           |
| Never                       | 4                                        | (21.1%) | 189                                       | (20.2%) | 193           |
| Previous                    | 8                                        | (42.1%) | 360                                       | (38.4%) | 368           |
| Unknown                     | 0                                        | (0.0%)  | 22                                        | (2.3%)  | 22            |
| <b>Charlson/Deyo</b>        |                                          |         |                                           |         |               |
| 0                           | 16                                       | (84.2%) | 813                                       | (86.8%) | 829           |
| 1                           | 0                                        | (0.0%)  | 16                                        | (1.7%)  | 16            |
| 2+                          | 3                                        | (15.8%) | 108                                       | (11.5%) | 111           |
| <b>Final Stage</b>          |                                          |         |                                           |         | 139           |
| N/A                         | 1                                        | (5.3%)  | 20                                        | (2.1%)  | 21            |
| 1                           | 5                                        | (26.3%) | 134                                       | (14.3%) | 139           |
| 2                           | 0                                        | (0.0%)  | 127                                       | (13.6%) | 127           |
| 3                           | 2                                        | (10.5%) | 184                                       | (19.6%) | 186           |
| 4                           | 11                                       | (57.9%) | 472                                       | (50.4%) | 483           |
| <b>Tumor Site</b>           |                                          |         |                                           |         |               |
| Larynx                      | 3                                        | (15.8%) | 329                                       | (35.1%) | 332           |
| Hypopharynx                 | 2                                        | (10.5%) | 61                                        | (6.5%)  | 63            |
| Lip/Oral                    | 8                                        | (42.1%) | 194                                       | (20.7%) | 202           |
| Nasopharynx                 | 0                                        | (0.0%)  | 40                                        | (4.3%)  | 40            |
| Nose/Sinus                  | 1                                        | (5.3%)  | 29                                        | (3.1%)  | 30            |
| Oropharynx                  | 5                                        | (26.3%) | 284                                       | (30.3%) | 289           |

**eTable 4.** Sensitivity analysis for exclusion of patients with follow-up $\leq$ 2 months. Multivariate cox regression model run with cohort including patients with follow-up $>$ 2months.

|                             | Hazard Ratio | 95% CI for Hazard Ratio |       |
|-----------------------------|--------------|-------------------------|-------|
|                             |              | Lower                   | Upper |
| <b>TTI&gt;60 days</b>       | 1.578        | 1.232                   | 2.022 |
| <b>Tumor Site</b>           |              |                         |       |
| Larynx (Reference)          |              |                         |       |
| Hypopharynx                 | 1.279        | 0.855                   | 1.914 |
| Lip/Oral                    | 0.927        | 0.669                   | 1.287 |
| Nasopharynx                 | 1.136        | 0.629                   | 2.049 |
| Nose/Sinus                  | 1.609        | 0.879                   | 2.947 |
| Oropharynx                  | 0.658        | 0.486                   | 0.891 |
| <b>Age</b>                  |              |                         |       |
| <50 years (Reference)       |              |                         |       |
| 50-60                       | 1.035        | 0.646                   | 1.656 |
| 60-70                       | 1.565        | 0.986                   | 2.486 |
| 70+                         | 2.193        | 1.384                   | 3.474 |
| <b>Tobacco Use</b>          |              |                         |       |
| Current                     |              |                         |       |
| Never                       | 0.568        | 0.396                   | 0.816 |
| Previous                    | 0.837        | 0.658                   | 1.064 |
| Unknown                     | 1.341        | 0.746                   | 2.411 |
| <b>Charlson/Deyo</b>        |              |                         |       |
| 0 (Reference)               |              |                         |       |
| 1                           | 1.498        | 0.73                    | 3.076 |
| 2+                          | 1.687        | 1.235                   | 2.304 |
| <b>Treatment Modality</b>   |              |                         |       |
| RT/CRT (Reference)          |              |                         |       |
| S                           | 0.758        | 0.543                   | 1.059 |
| S+                          | 0.691        | 0.515                   | 0.927 |
| <b>Treatment Completion</b> |              |                         |       |
| No (Reference)              |              |                         |       |
| Yes                         | 0.351        | 0.227                   | 0.543 |
| N/A                         | 0.788        | 0.5                     | 1.24  |
| <b>Final Stage</b>          |              |                         |       |
| 4 (Reference)               |              |                         |       |
| N/A                         | 1.349        | 0.84                    | 2.166 |
| 1                           | 1.474        | 0.953                   | 2.281 |
| 2                           | 2.759        | 1.836                   | 4.146 |



|                                    |       |       |       |
|------------------------------------|-------|-------|-------|
| 3                                  | 4.001 | 1.728 | 9.264 |
| <b>Race/Ethnicity</b>              |       |       |       |
| Black/African-American (Reference) |       |       |       |
| Asian                              | 1.743 | 0.671 | 4.526 |
| Declined                           | 1.359 | 0.991 | 1.863 |
| Hispanic                           | 0.68  | 0.447 | 1.033 |
| White                              | 1.388 | 1.025 | 1.88  |
| <b>Language</b>                    |       |       |       |
| Not English (Reference)            |       |       |       |
| English                            | 0.694 | 0.513 | 0.939 |
| N/A                                | 0.889 | 0.531 | 1.488 |

**eTable 5.** Hazard ratios for TTI>60 (vs. TTI≤60) in subgroup analysis of primary site, treatment modality, and final stage. These hazard ratios are adjusted for the remainder covariates in the Multivariate Cox Regression in Table 2.

|                           | HR for TTI > 60 days | 95% CI for Hazard Ratio |       |
|---------------------------|----------------------|-------------------------|-------|
|                           |                      | Lower                   | Upper |
| <b>Tumor Site</b>         |                      |                         |       |
| Larynx                    | 2.20                 | 1.39                    | 3.49  |
| Oropharynx                | 1.97                 | 1.18                    | 3.28  |
| Nose/Sinus <sup>a</sup>   | 0.08                 | 0                       | -     |
| Hypopharynx               | 1.14                 | 0.38                    | 3.40  |
| Nasopharynx <sup>a</sup>  | 0                    | 0                       | -     |
| Lip/Oral                  | 0.94                 | 0.48                    | 1.85  |
| <b>Treatment Modality</b> |                      |                         |       |
| Surgery Alone             | 2.15                 | 1.13                    | 4.07  |
| CRT                       | 1.38                 | 0.99                    | 1.92  |
| SCRT                      | 1.83                 | 0.95                    | 3.54  |
| <b>Final Stage</b>        |                      |                         |       |
| Stage I/II                | 1.94                 | 1.08                    | 3.50  |
| Stage III/IV              | 1.47                 | 1.12                    | 1.96  |

a. Upper range of confidence interval was too large to include in table due to inadequate sample size in nose/sinus and nasopharynx cancers

**eTable 6.** Full multivariate logistic regression to examine significant factors that could potentially predict delayed TTI based on the optimal threshold of 60 days.

|                                                                          | Odds Ratio | 95% CI for Odds Ratio |       |
|--------------------------------------------------------------------------|------------|-----------------------|-------|
|                                                                          |            | Lower                 | Upper |
| <b>Marital Status</b>                                                    |            |                       |       |
| Married (Reference)                                                      |            |                       |       |
| Not Married                                                              | 1.22       | 0.841                 | 1.771 |
| N/A                                                                      | 0.418      | 0.115                 | 1.524 |
| <b>Not diagnosed at other facility (vs. diagnosed at other facility)</b> |            |                       |       |
|                                                                          | 0.529      | 0.369                 | 0.757 |
| <b>Insurance</b>                                                         |            |                       |       |
| Commercial (Reference)                                                   |            |                       |       |
| Medicaid                                                                 | 2.168      | 1.283                 | 3.663 |
| Medicare                                                                 | 1.394      | 0.837                 | 2.323 |
| Other                                                                    | 1.105      | 0.554                 | 2.207 |
| Uninsured                                                                | 2.336      | 0.833                 | 6.548 |
| N/A                                                                      | 2.182      | 0.873                 | 5.451 |
| <b>Race/Ethnicity</b>                                                    |            |                       |       |
| Black/African-American (Reference)                                       |            |                       |       |
| Asian                                                                    | 0.943      | 0.227                 | 3.917 |
| Declined                                                                 | 0.545      | 0.345                 | 0.862 |
| Hispanic                                                                 | 0.832      | 0.52                  | 1.332 |
| White                                                                    | 0.525      | 0.326                 | 0.845 |
| <b>Socioeconomic Status</b>                                              |            |                       |       |
| Fourth Quartile:>-.57 (Reference)                                        |            |                       |       |
| Quartile 1: <-5.6                                                        | 1.232      | 0.74                  | 2.051 |
| Quartile 2: -5.6 to -2.17                                                | 1.027      | 0.618                 | 1.707 |
| Quartile 3: -2.17 to 0.57                                                | 0.999      | 0.603                 | 1.653 |
| N/A                                                                      | 0.579      | 0.211                 | 1.587 |
| <b>BMI</b>                                                               |            |                       |       |
| 18.5-30 (Reference)                                                      |            |                       |       |
| Underweight <18.5                                                        | 1.743      | 1.051                 | 2.889 |
| Obese >30                                                                | 0.89       | 0.564                 | 1.402 |
| N/A                                                                      | 1.178      | 0.655                 | 2.116 |
